# Supplementary material for: The Role of SHIP1 on Apoptosis and Autophagy in the Adipose Tissue of Obese Mice
Source: PubMed Central journal article supplement (PMC7582772; doi:10.3390/ijms21197225), 2020-09-30
Supplement: ijms-21-07225-s001.pdf [file ijms-21-07225-s001.pdf]

# The Role of SHIP1 on Apoptosis and Autophagy in the Adipose Tissue of Obese Mice

Jae Hun Jeong, Hye Min Jang, Eun Bee Choi, Yu Jeong Ahn, Hyeong Seok An, Jong Youl Lee, Kyung-Ah Park, Eun Ae Jeong, Hyun Joo Shin, Jaewoong Lee, Kyung Eun Kim and Gu Seob Roh \*

Department of Anatomy and Convergence Medical Science, Bio Antiaging Medical Research Center, Institute of Health Sciences, College of Medicine, Gyeongsang National University, Jinju, Gyeongnam, Republic of Korea

**Supplementary Table 1.** List of common differentially expressed genes related to apoptosis and inflammation in the adipose tissue of control, diet-induced obesity, and *ob/ob* mice.

| ID                 | Symbol        | logFC    | <i>p</i> Value |
|--------------------|---------------|----------|----------------|
| ENSMUSG00000055024 | <i>Fga</i>    | -6.46132 | 0.003641       |
| ENSMUSG00000019843 | <i>Fgb</i>    | -6.12832 | 0.001492       |
| ENSMUSG00000025958 | <i>Ctla4</i>  | -6.00097 | 0.000819       |
| ENSMUSG00000020605 | <i>Adipoq</i> | -3.27777 | 1.24E-09       |
| ENSMUSG00000027598 | <i>Ddit4</i>  | -2.82899 | 9.91E-10       |
| ENSMUSG00000028029 | <i>Fgfr3</i>  | -2.67056 | 1.70E-06       |
| ENSMUSG00000022200 | <i>Edn1</i>   | -2.38541 | 6.85E-07       |
| ENSMUSG00000034218 | <i>Hcar2</i>  | -2.38072 | 6.89E-06       |
| ENSMUSG00000027951 | <i>C6</i>     | -2.32903 | 2.04E-05       |
| ENSMUSG00000022508 | <i>Gsn</i>    | -2.0003  | 6.66E-05       |
| ENSMUSG00000025809 | <i>Gpam</i>   | -1.99022 | 8.55E-08       |
| ENSMUSG00000031511 | <i>Cd59b</i>  | -1.9811  | 7.69E-05       |
| ENSMUSG00000006699 | <i>Irs2</i>   | -1.93308 | 2.72E-09       |
| ENSMUSG00000027944 | <i>Jag2</i>   | -1.90104 | 0.000102       |
| ENSMUSG00000020053 | <i>Bnip3</i>  | -1.88001 | 7.66E-06       |
| ENSMUSG00000054717 | <i>Dab2ip</i> | -1.84258 | 1.75E-09       |
| ENSMUSG00000028191 | <i>Esr1</i>   | -1.74076 | 1.50E-07       |
| ENSMUSG00000000787 | <i>Dll1</i>   | -1.71297 | 0.002202       |
| ENSMUSG00000037405 | <i>Egr1</i>   | -1.70343 | 0.002635       |
| ENSMUSG00000015656 | <i>Cav1</i>   | -1.65249 | 0.000548       |
| ENSMUSG00000038160 | <i>Cnr1</i>   | -1.39357 | 0.002675       |
| ENSMUSG00000001729 | <i>Hoxa5</i>  | -1.28892 | 0.004514       |
| ENSMUSG00000033538 | <i>Itga1</i>  | -1.256   | 0.004139       |
| ENSMUSG00000057789 | <i>Fgf10</i>  | -1.13288 | 0.001435       |
| ENSMUSG00000060216 | <i>Cd38</i>   | -1.1312  | 8.22E-06       |
| ENSMUSG00000052085 | <i>Gpld1</i>  | -1.12901 | 0.000499       |
| ENSMUSG00000032359 | <i>Epha2</i>  | -1.11901 | 0.008496       |
| ENSMUSG00000045005 | <i>Irak2</i>  | -1.10552 | 9.96E-05       |

|                    |                |          |          |
|--------------------|----------------|----------|----------|
| ENSMUSG00000031628 | <i>Erb2</i>    | -1.09027 | 0.002484 |
| ENSMUSG00000035992 | <i>Bmp6</i>    | -1.03176 | 0.001187 |
| ENSMUSG00000030528 | <i>Fas</i>     | -0.89236 | 0.000721 |
| ENSMUSG00000003873 | <i>Bcl2</i>    | -0.70785 | 0.000307 |
| ENSMUSG00000029657 | <i>Gfer</i>    | -0.68725 | 0.001407 |
| ENSMUSG00000024659 | <i>Birc2</i>   | -0.58819 | 0.006624 |
| ENSMUSG00000042349 | <i>Bcap31</i>  | -0.53533 | 0.008235 |
| ENSMUSG00000024621 | <i>Glo1</i>    | -0.42479 | 0.004091 |
| ENSMUSG00000044147 | <i>Dnaja3</i>  | -0.4183  | 0.008946 |
| ENSMUSG00000044303 | <i>Ep300</i>   | 0.499157 | 0.006547 |
| ENSMUSG00000031616 | <i>Fyn</i>     | 0.518861 | 0.004211 |
| ENSMUSG00000068227 | <i>Creb1</i>   | 0.549847 | 0.000749 |
| ENSMUSG00000017652 | <i>Hs1bp3</i>  | 0.560734 | 0.001791 |
| ENSMUSG00000052593 | <i>Gpi1</i>    | 0.566032 | 0.004435 |
| ENSMUSG00000026596 | <i>Itch</i>    | 0.573925 | 0.001668 |
| ENSMUSG00000030707 | <i>Aimp1</i>   | 0.579709 | 0.007314 |
| ENSMUSG00000027087 | <i>Golph3</i>  | 0.594232 | 0.001149 |
| ENSMUSG00000099974 | <i>Atm</i>     | 0.600186 | 0.001181 |
| ENSMUSG00000054428 | <i>Adar</i>    | 0.616173 | 0.001732 |
| ENSMUSG00000025001 | <i>Bcl6</i>    | 0.635089 | 0.003493 |
| ENSMUSG00000024397 | <i>Itgb1</i>   | 0.684814 | 0.000771 |
| ENSMUSG00000039145 | <i>Arhgef7</i> | 0.711919 | 1.82E-05 |
| ENSMUSG00000033792 | <i>Cdc42</i>   | 0.736628 | 0.000122 |
| ENSMUSG00000031778 | <i>Hax1</i>    | 0.761821 | 0.000796 |
| ENSMUSG00000027381 | <i>Igf1</i>    | 0.763898 | 0.001868 |
| ENSMUSG00000026928 | <i>Hmgb2</i>   | 0.764097 | 0.002502 |
| ENSMUSG00000037860 | <i>Bcl10</i>   | 0.771833 | 3.31E-05 |
| ENSMUSG00000026288 | <i>Ddx3x</i>   | 0.787552 | 8.88E-05 |
| ENSMUSG00000035042 | <i>Icam1</i>   | 0.836098 | 0.003439 |
| ENSMUSG00000032093 | <i>Hspa8</i>   | 0.843284 | 0.000386 |
| ENSMUSG00000017697 | <i>Atg5</i>    | 0.916843 | 0.000266 |
| ENSMUSG00000029771 | <i>Akt1</i>    | 0.958977 | 3.15E-05 |
| ENSMUSG00000003812 | <i>Casp4</i>   | 0.992875 | 0.003007 |
| ENSMUSG00000022831 | <i>Bak1</i>    | 1.027466 | 8.87E-08 |
| ENSMUSG00000030641 | <i>Arrb2</i>   | 1.047866 | 1.25E-05 |
| ENSMUSG00000049130 | <i>Dock8</i>   | 1.061942 | 0.000124 |
| ENSMUSG00000058715 | <i>Ctsh</i>    | 1.089908 | 0.000124 |

|                    |                |          |          |
|--------------------|----------------|----------|----------|
| ENSMUSG00000079227 | <i>Fzd5</i>    | 1.188341 | 2.20E-05 |
| ENSMUSG00000031264 | <i>Casp3</i>   | 1.194145 | 2.03E-10 |
| ENSMUSG00000025888 | <i>Fnip1</i>   | 1.215688 | 1.31E-08 |
| ENSMUSG00000029915 | <i>Blm</i>     | 1.225639 | 0.00104  |
| ENSMUSG00000036526 | <i>Bax</i>     | 1.252833 | 5.59E-06 |
| ENSMUSG00000005087 | <i>Hsph1</i>   | 1.263258 | 2.48E-08 |
| ENSMUSG00000003283 | <i>Anxa1</i>   | 1.339567 | 2.61E-07 |
| ENSMUSG00000004296 | <i>Ikbke</i>   | 1.347374 | 7.56E-08 |
| ENSMUSG00000000982 | <i>Csf1r</i>   | 1.368415 | 4.32E-10 |
| ENSMUSG00000015854 | <i>Arf6</i>    | 1.41026  | 2.45E-13 |
| ENSMUSG00000015437 | <i>Cdkn2a</i>  | 1.425399 | 0.003655 |
| ENSMUSG00000005413 | <i>Ednra</i>   | 1.439549 | 9.79E-05 |
| ENSMUSG00000032076 | <i>Il2rb</i>   | 1.4828   | 0.000935 |
| ENSMUSG00000026981 | <i>Cd40</i>    | 1.493801 | 2.98E-05 |
| ENSMUSG00000025473 | <i>Adam17</i>  | 1.544802 | 4.41E-13 |
| ENSMUSG00000026596 | <i>Abl2</i>    | 1.564504 | 4.67E-09 |
| ENSMUSG00000030707 | <i>Coro1a</i>  | 1.567917 | 3.66E-12 |
| ENSMUSG00000027087 | <i>Itgav</i>   | 1.605422 | 3.06E-18 |
| ENSMUSG00000099974 | <i>Bcl2a1d</i> | 1.669281 | 0.00017  |
| ENSMUSG00000054428 | <i>Atpif1</i>  | 1.673306 | 1.39E-08 |
| ENSMUSG00000025001 | <i>Hells</i>   | 1.683084 | 2.34E-06 |
| ENSMUSG00000024397 | <i>Aif1</i>    | 1.771951 | 5.58E-08 |
| ENSMUSG00000039145 | <i>Camk1d</i>  | 1.798252 | 1.23E-16 |
| ENSMUSG00000033792 | <i>Atp7a</i>   | 1.835452 | 1.87E-08 |
| ENSMUSG00000031778 | <i>Cx3cl1</i>  | 1.867246 | 0.001911 |
| ENSMUSG00000027381 | <i>Bcl2l11</i> | 1.899143 | 7.95E-17 |
| ENSMUSG00000026928 | <i>Card9</i>   | 1.903507 | 1.80E-10 |
| ENSMUSG00000037860 | <i>Aim2</i>    | 1.966615 | 4.03E-10 |
| ENSMUSG00000026288 | <i>Inpp5d</i>  | 1.979603 | 8.96E-14 |
| ENSMUSG00000035042 | <i>Ccl5</i>    | 2.072736 | 1.19E-05 |
| ENSMUSG00000032093 | <i>Cd3e</i>    | 2.086772 | 0.000826 |
| ENSMUSG00000017697 | <i>Ada</i>     | 2.088379 | 2.41E-09 |
| ENSMUSG00000029771 | <i>Irf5</i>    | 2.132703 | 4.73E-15 |
| ENSMUSG00000003812 | <i>Dnase2a</i> | 2.262342 | 3.99E-19 |
| ENSMUSG00000022831 | <i>Hcls1</i>   | 2.36304  | 1.30E-26 |
| ENSMUSG00000030641 | <i>Ddias</i>   | 2.408192 | 6.90E-05 |
| ENSMUSG00000049130 | <i>C5ar1</i>   | 2.449373 | 8.95E-21 |

|                    |               |          |          |
|--------------------|---------------|----------|----------|
| ENSMUSG00000058715 | <i>Fcer1g</i> | 2.466747 | 4.70E-19 |
| ENSMUSG00000079227 | <i>Ccr5</i>   | 2.542427 | 2.95E-13 |
| ENSMUSG00000031264 | <i>Btk</i>    | 2.553092 | 3.00E-27 |
| ENSMUSG00000025888 | <i>Casp1</i>  | 2.562511 | 2.85E-19 |
| ENSMUSG00000029915 | <i>Clec5a</i> | 2.563579 | 4.86E-05 |
| ENSMUSG00000036526 | <i>Card11</i> | 2.701022 | 0.001801 |
| ENSMUSG00000005087 | <i>Cd44</i>   | 3.194564 | 6.31E-20 |
| ENSMUSG00000003283 | <i>Hck</i>    | 3.361242 | 5.31E-36 |
| ENSMUSG00000004296 | <i>Il12b</i>  | 3.362556 | 0.000641 |
| ENSMUSG00000000982 | <i>Ccl3</i>   | 3.541358 | 1.53E-16 |
| ENSMUSG00000015854 | <i>Cd5l</i>   | 3.569841 | 0.000767 |
| ENSMUSG00000015437 | <i>Gzmb</i>   | 3.580866 | 0.000633 |
| ENSMUSG00000005413 | <i>Hmox1</i>  | 3.656041 | 6.72E-08 |
| ENSMUSG00000032076 | <i>Cadm1</i>  | 3.906108 | 3.68E-18 |
| ENSMUSG00000026981 | <i>Il1rn</i>  | 4.900183 | 1.26E-14 |
| ENSMUSG00000025473 | <i>Adam8</i>  | 5.698634 | 7.67E-36 |

**Supplementary Table 2.** List of primers for qRT-PCR.

| <b>Gene Name</b>               | <b>Primer Sequences</b>                                                          |
|--------------------------------|----------------------------------------------------------------------------------|
| <i>Inpp5d (Ship1)</i>          | Forward 5'-CAAGAGTCAGGAAGGAGAGAATG 3'<br>Reverse 5'-GGGTCAGAGATAATG GGCTTTAG-3'  |
| <i>Tnf-<math>\alpha</math></i> | Forward 5'-TGGGAGTAGATAAGGTACAGCCC-3'<br>Reverse 5'-CATCTTCTCAAAACTCGAGTGACAA-3' |
| <i>Mcp1</i>                    | Forward 5'- CCACTCACCTGCTGCTACTCA-3'<br>Reverse 5'- TGGTGATCCTCTTGCTAGCTCTCC -3' |
| <i>Arg1</i>                    | Forward 5'-AAAGCTGGTCTGCTGGAAAA-3'<br>Reverse 5'-ACAGACCGTGGGTTCTTCAC-3'         |
| <i>Il-10</i>                   | Forward 5'- CCAGGGAGATCCTTTGATGA -3'<br>Reverse 5'- AACTGGCCACAGTTTTTCAGG -3'    |
| <i>Bax</i>                     | Forward 5'-GAAGTTGCCATCAGCAAACAT-3'<br>Reverse 5'-GGAGATGAACTGGACAGCAATA-3'      |
| <i>Bcl-2</i>                   | Forward 5'-GAGACAGCCAGGAGAAATCAA-3'<br>Reverse 5'-GTGGATGACTGAGTACCTGAAC-3'      |
| <i>CCR5</i>                    | Forward 5'-CTTGTCATGGTCATCTGCTACTC-3'<br>Reverse 5'-CCTGTGCCTCTTCTTCTCATTC-3'    |
| <i>CCL5</i>                    | Forward 5'-GCCCACGTCAAGGAGTATTT-3'<br>Reverse 5'-CTTGAACCCACTTCTTCTCTGG-3'       |

**Supplementary Table 3.** List of primary antibodies.

| <b>Antibody</b>                    | <b>Company</b> | <b>Catalog No.</b> | <b>Dilution</b> | <b>Applications</b> | <b>Source</b> |
|------------------------------------|----------------|--------------------|-----------------|---------------------|---------------|
| <b>SHIP1</b>                       | Santa Cruz     | sc-8425            | 1:1000, 1:200   | WB<br>IHC, IF       | Mouse         |
| <b>Bax</b>                         | Santa Cruz     | sc-7480            | 1:1,000         | WB                  | Mouse         |
| <b>Bcl-2</b>                       | Santa Cruz     | sc-492             | 1:1000          | WB                  | Rabbit        |
| <b>Cleaved caspase-3</b>           | Cell signaling | #9664              | 1:1,000         | WB                  | Rabbit        |
| <b>Perilipin 1</b>                 | Abcam          | ab61682            | 1:200           | IF                  | Goat          |
| <b>CD11b</b>                       | Abcam          | ab128797           | 1:200           | IF                  | Rabbit        |
| <b>CD68</b>                        | Santa Cruz     | sc-20060           | 1:200           | IHC                 | Mouse         |
| <b>PI3K</b>                        | Santa Cruz     | sc-1637            | 1:1000          | WB                  | Mouse         |
| <b>p-Akt</b>                       | Cell signaling | #9271              | 1:1000          | WB                  | Rabbit        |
| <b>t-Akt</b>                       | Santa Cruz     | sc-8312            | 1:1000          | WB                  | Rabbit        |
| <b>p62</b>                         | SIGMA          | P0067              | 1:1000          | WB                  | Mouse         |
| <b>LC3B</b>                        | SIGMA          | L7543              | 1:1000          | WB                  | Mouse         |
| <b>LAMP1</b>                       | Santa Cruz     | ab24170            | 1:1000<br>1:200 | WB<br>IF            | Rabbit        |
| <b><math>\alpha</math>-tubulin</b> | Sigma-Aldrich  | T5168              | 1:1000          | WB                  | Mouse         |

IF, immunofluorescence; IHC, immunohistochemistry; WB, Western blot.

# A

## Biological Process (BP)

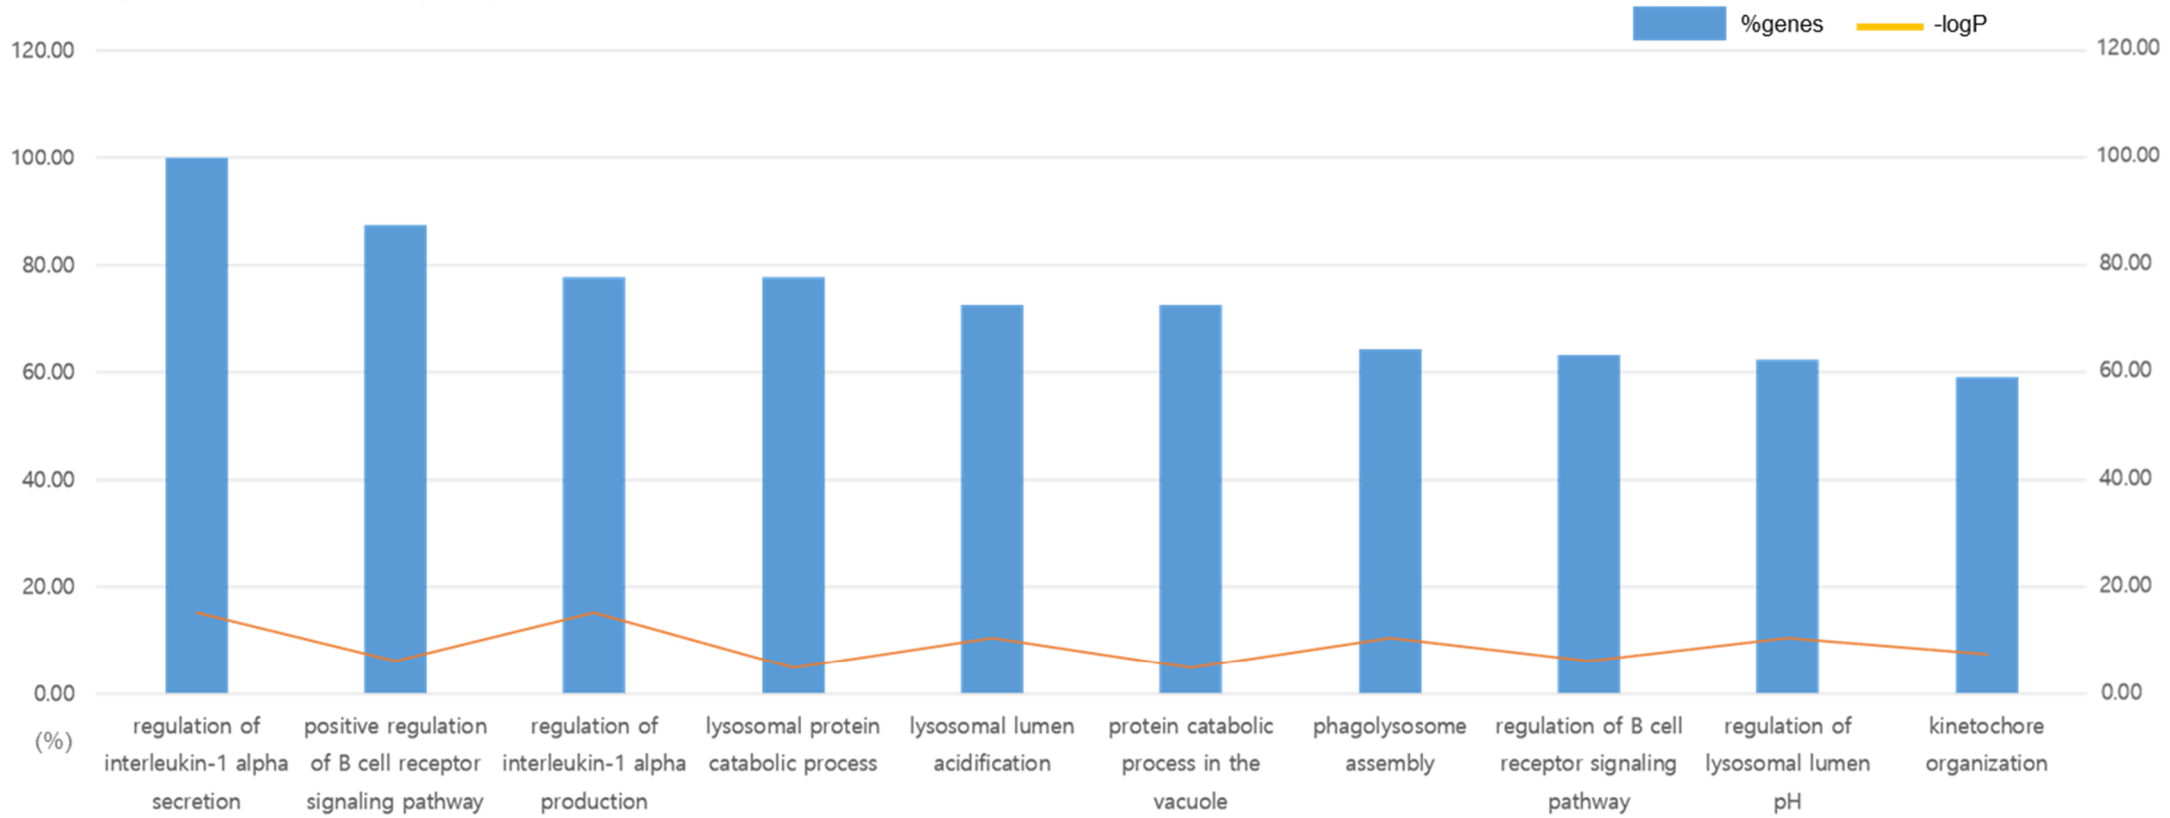

# B

## Cellular Components (CC)

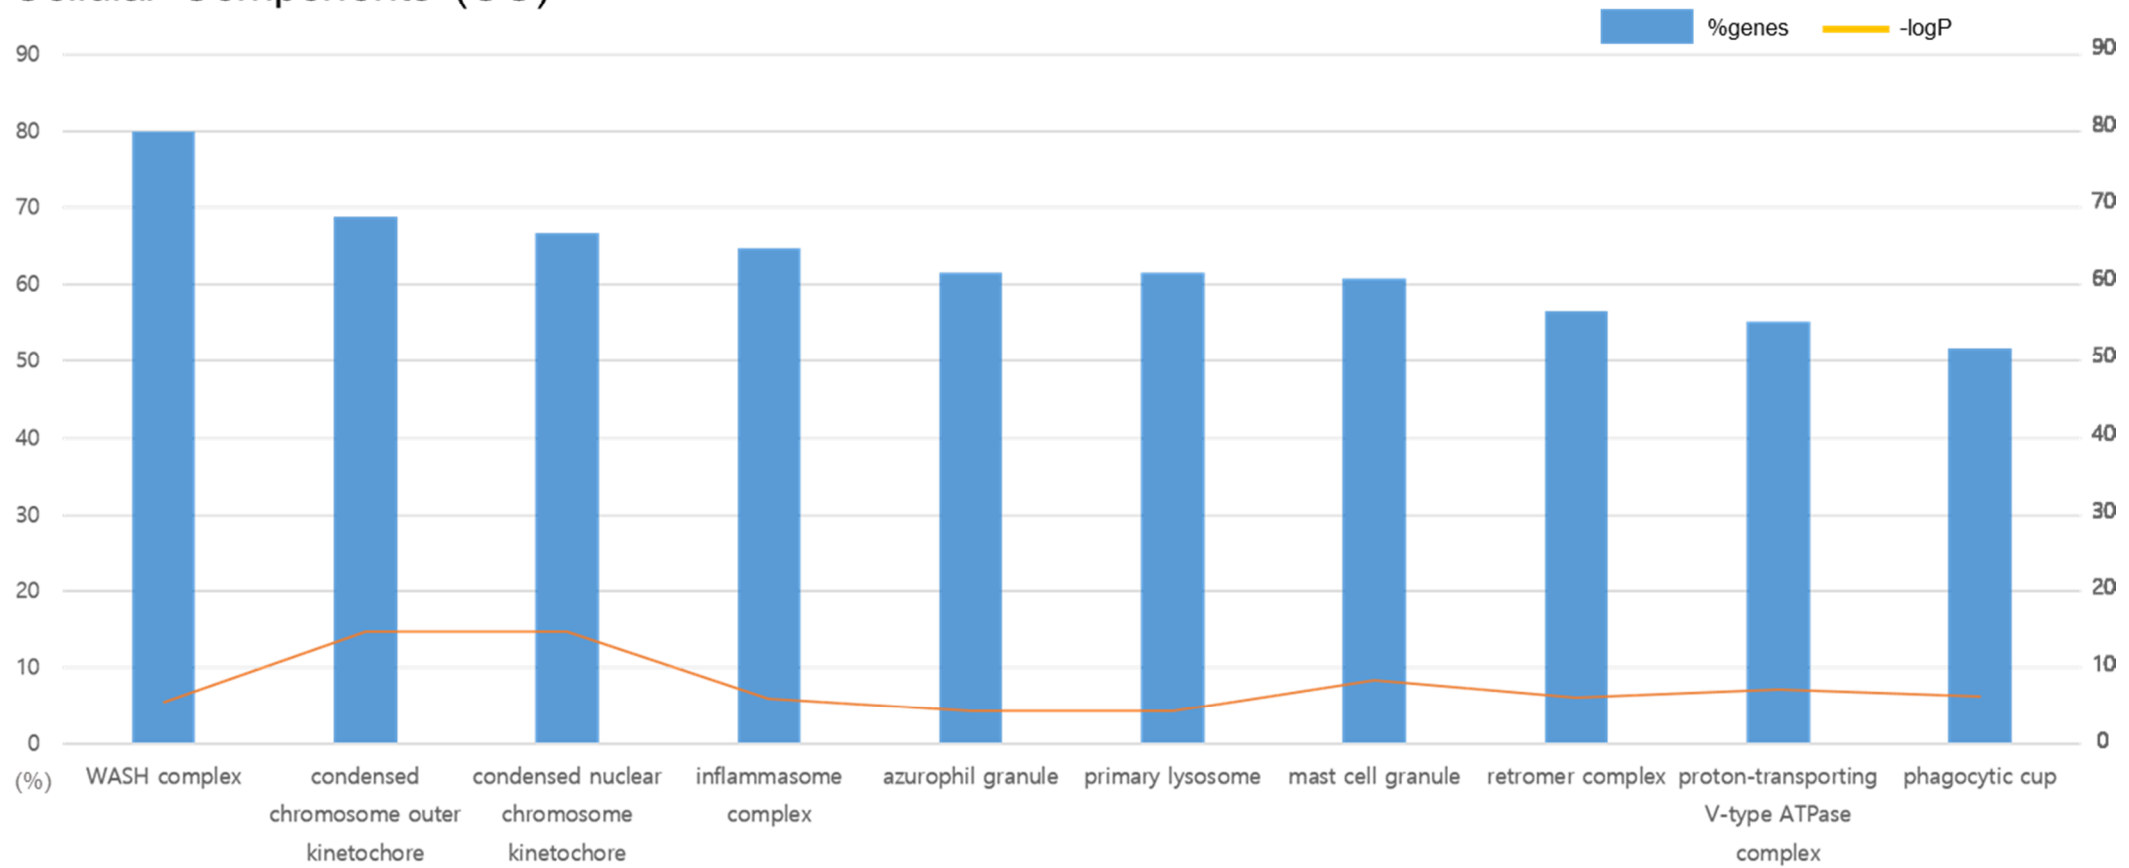



# C

## Molecular Function (MF)

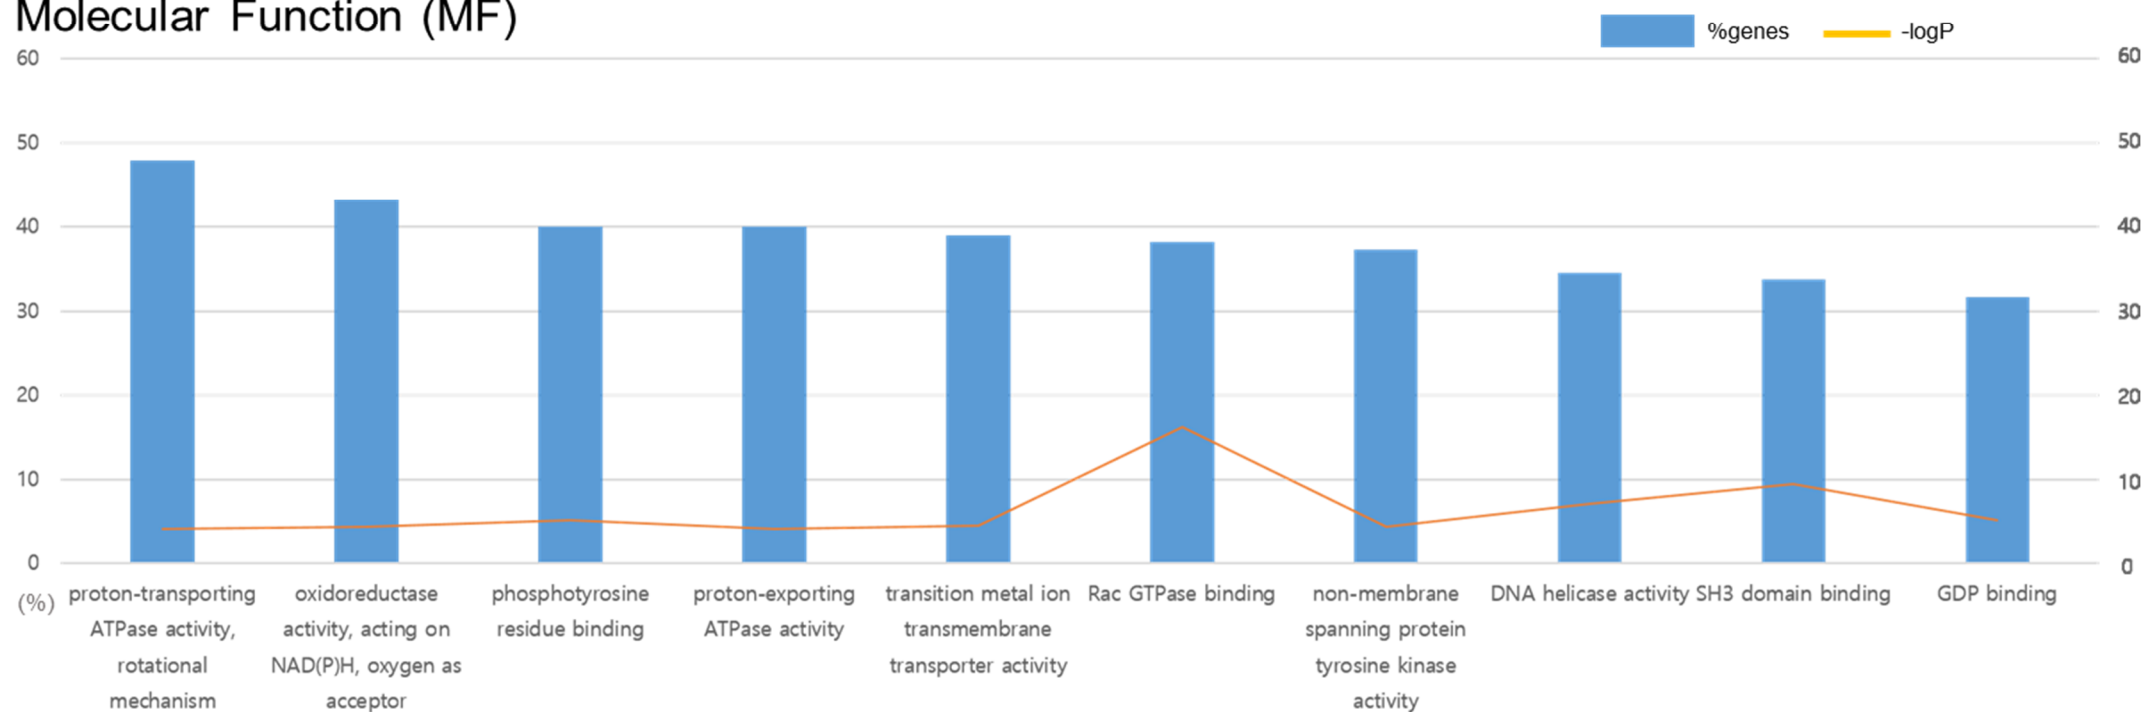

**Supplementary Figure 1. Enrichment analysis of gene ontology (GO).** Enriched GO terms of biological process (A), cellular component (B), and molecular function (C) using ClueGO pathway enrichment analysis in the adipose tissue of wild-type and obese (diet-induced or *ob/ob*) mice. Only representative GO terms that include more than two sibling terms are displayed. Blue bars indicate the proportion of associated genes, and yellow lines indicate  $-\log(P \text{ value})$  of the enrichment analysis.

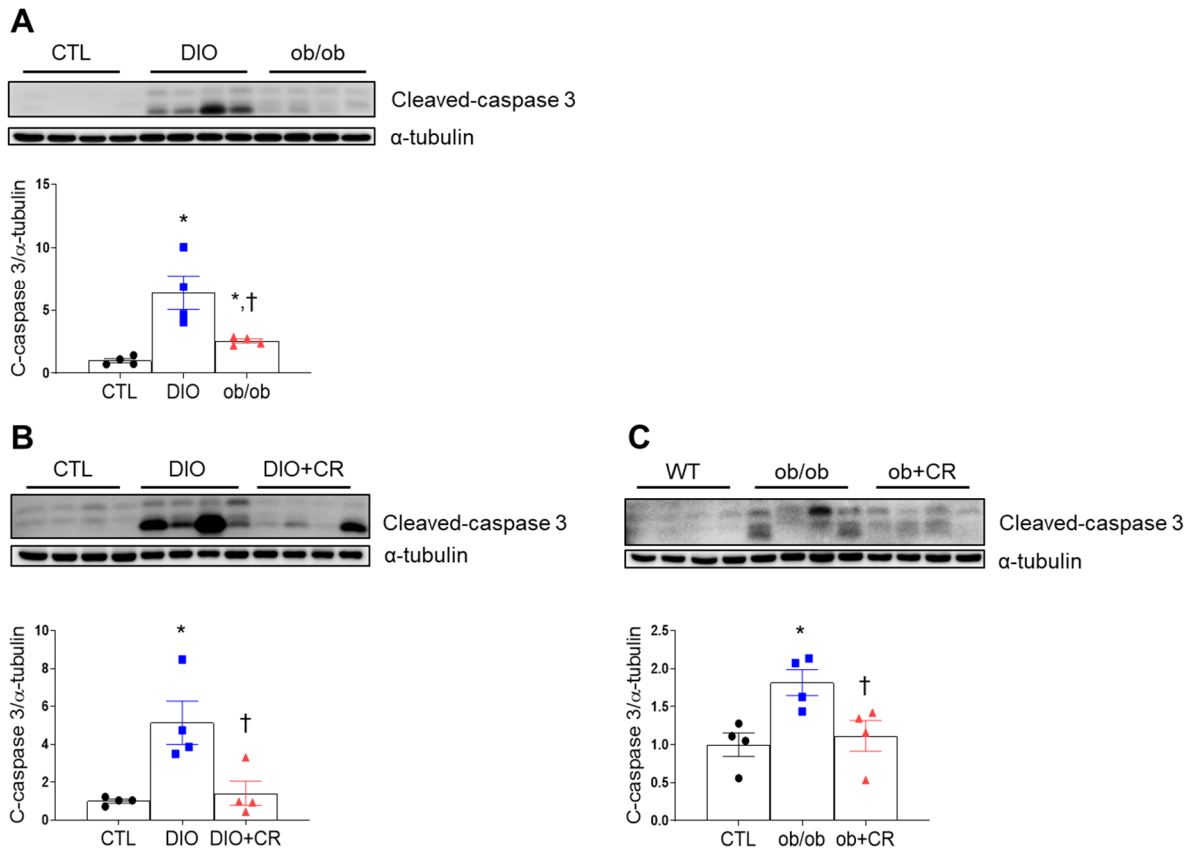

**Supplementary Figure 2. Expression of cleaved caspase 3 in the adipose tissues of DIO and ob/ob mice.** (A) Western blot and quantitative analysis of cleaved caspase 3 protein expression in CTL, DIO, and ob/ob mice. (B and C) Effect of caloric restriction on cleaved caspase 3 expression in the adipose tissues of DIO and ob/ob mice. Data are presented as the means  $\pm$  SEM. \* $P < 0.05$  versus control (CTL) or wild type (WT) mice; † $P < 0.05$  versus diet-induced obesity (DIO) or ob/ob mice. CTL (black circle), DIO (blue square), ob/ob (red triangle).
